# Supplementary material for: Small molecule-based photocrosslinkable fluorescent materials toward multilayered and high-resolution emissive patterning
Source: Royal Society of Chemistry journal article supplement (doi:10.1039/c5tc01453k), 2015-01-01
Supplement: c5tc01453k1.pdf [file c5tc01453k1.pdf]

## ELECTRONIC SUPPLEMENTARY INFORMATION

### Small molecule-based photocrosslinkable fluorescent materials toward multilayered and high-resolution emissive patterning

*Simon Olivier,<sup>ab</sup> Lionel Derue,<sup>c</sup> Bernard Geffroy,<sup>c</sup> Tony Maindron,<sup>b</sup> Eléna Ishow,<sup>\*a</sup>*

<sup>a</sup>CEISAM-UMR CNRS 6230, Université de Nantes, 2 rue de la Houssinière, 44322 Nantes, France. <sup>b</sup>CEA LETI, LETI/DOPT/SCOOP/LCV, Minatech Campus, 17 rue des Martyrs, 38054 Grenoble, France. <sup>c</sup>CEA Saclay, IRAMIS (UMR CNRS 3685), LICSEN, F-91191 Gif-sur-Yvette, France. LPICM-UMR CNRS 7647, Ecole Polytechnique, Route de Saclay, 91128 Palaiseau, France.

## CONTENT

### 1. Differential Scanning Calorimetry thermograms

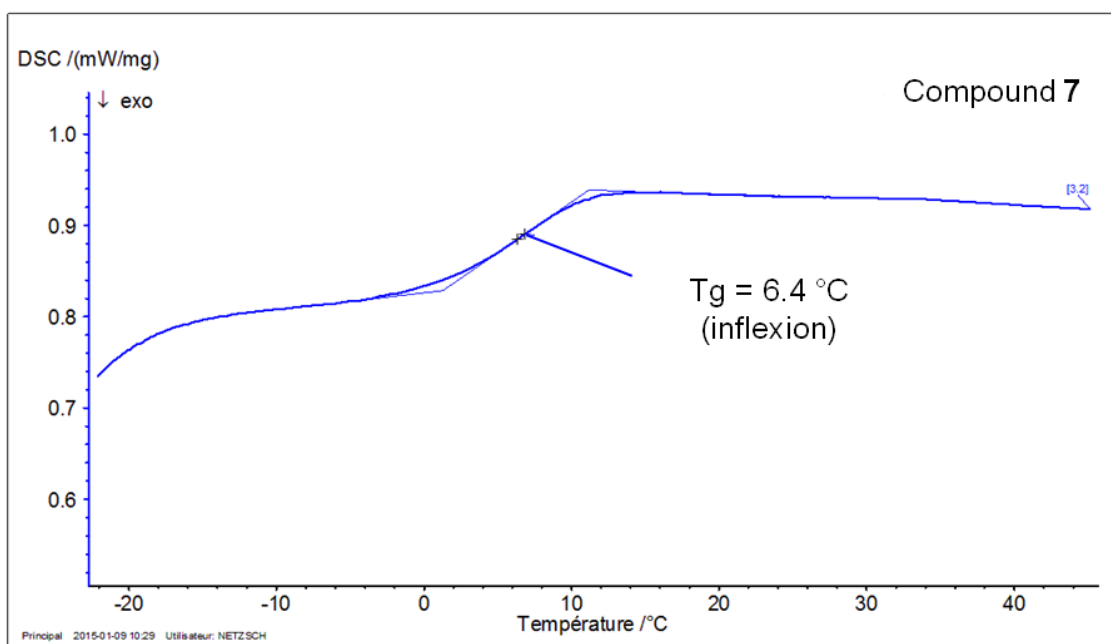

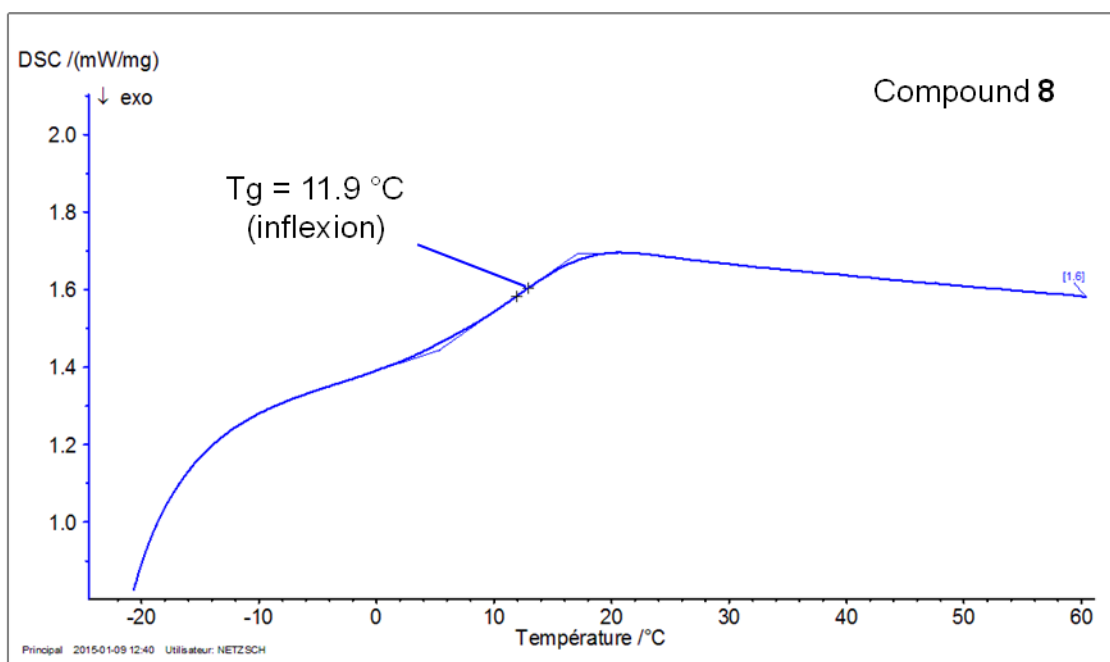

**Figure S1.** DSC thermograms for compounds **7** and **8** on the [-30; 140] °C temperature range using a 30 °C.min<sup>-1</sup> thermal gradient.

## 2. AFM imaging of stacked photopatterns

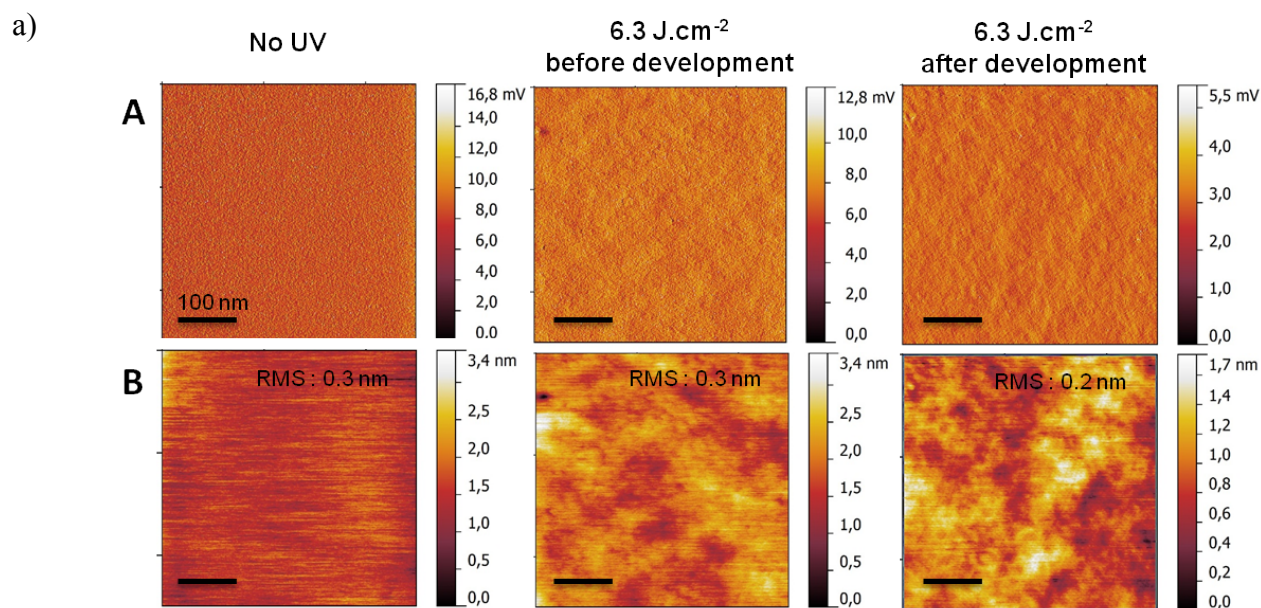

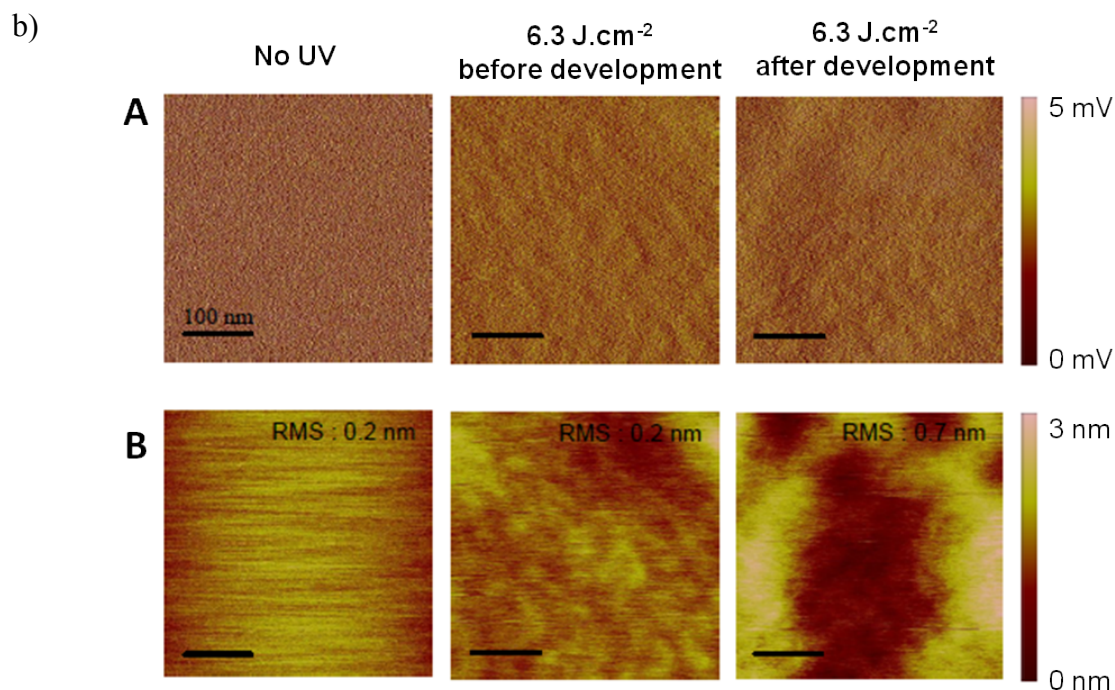

**Figure S2.** AFM images of thin films **7** (a) and **8** (b) containing 3 mol. % TPO before irradiation, after irradiation ( $\lambda_{\text{exc}} = 365 \text{ nm}$  with a  $6.3 \text{ J.cm}^{-2}$  exposure dose), and after development. A) Phase contrast, and B) topography images.

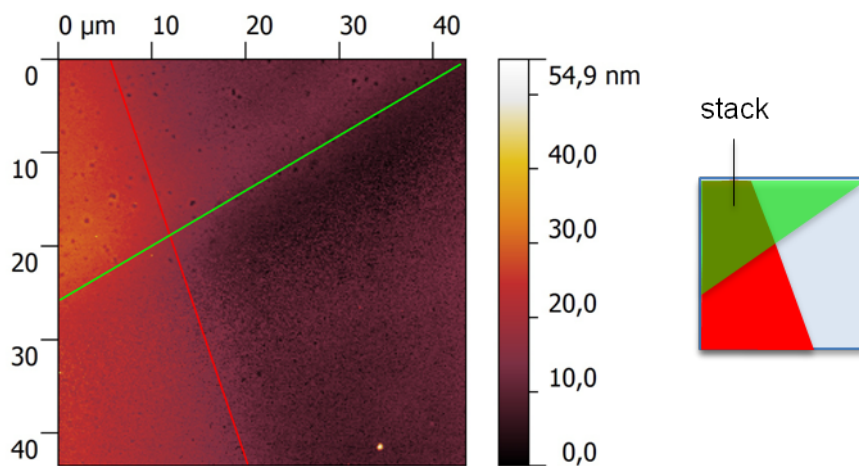

**Figure S3** AFM images of a stacked bilayer obtained after successive deposition, photoirradiation and development of solution of red emitter **8** and green emitter **7** containing 3 mol. % TPO ( $\lambda_{\text{exc}} = 365 \text{ nm}$  with a  $0.026 \text{ J.cm}^{-2}$  exposure dose).
